# Supplementary material for: Predictors of Post-Traumatic Growth in a Sample of United Kingdom Mental and Community Healthcare Workers during the COVID-19 Pandemic
Source: MDPI journal article supplement (doi:10.3390/ijerph20043539), 2023-02-17
Supplement: s1 [file s1]

**Supplementary Online Information Table S1. Multiple regression models 1 to 9**

|                                                                                                                                                                                                                                            |                                                                                                                                                                                                                                                                                                           | Adjusted R-squared | Likelihood ratio test        |
|--------------------------------------------------------------------------------------------------------------------------------------------------------------------------------------------------------------------------------------------|-----------------------------------------------------------------------------------------------------------------------------------------------------------------------------------------------------------------------------------------------------------------------------------------------------------|--------------------|------------------------------|
| Model 0<br>Empty model                                                                                                                                                                                                                     | $R^2 = 0.00$<br>B = 20.35, 95% CI 19.6 to 21.1, $p < 0.0001$                                                                                                                                                                                                                                              | 0.00               |                              |
| Model 1 Self-reflection<br>Time spent on positive self-reflection                                                                                                                                                                          | $R^2 = 0.09$<br>B = 3.61, 95% CI 2.86 to 4.37, $p < 0.0001$                                                                                                                                                                                                                                               | 0.09               | $X^2 = 84.3$ , $p < 0.0001$  |
| Model 2 Ethnicity<br>Time spent on positive self-reflection<br>Ethnicity<br>Vs. White:<br>Asian<br><br>Black<br><br>Mixed                                                                                                                  | $R^2 = 0.17$<br>B = 3.28, 95% CI 2.55 to 4.02, $p < 0.0001$<br><br>B = 9.76, 95% CI 6.68 to 12.82, $p < 0.0001$<br>B = 11.36, 95% CI 7.97 to 14.75, $p < 0.0001$<br>B = 2.24, 95% CI -1.40 to 5.88, $p = 0.23$                                                                                            | 0.17               | $X^2 = 75.09$ , $p < 0.0001$ |
| Model 3 Skills development<br>Time spent on positive self-reflection<br><br>Ethnicity<br>Vs. White:<br>Asian<br><br>Black<br><br>Mixed<br><br>Developed new skills in physical healthcare<br><br>Developed new skills in mental healthcare | $R^2 = 0.22$<br>B = 2.62, 95% CI 1.86 to 3.38, $p < 0.0001$<br><br>B = 8.58, 95% CI 5.54 to 11.61, $p < 0.001$<br>B = 10.54, 95% CI 7.20 to 13.89, $p < 0.0001$<br>B = 2.09, 95% CI -1.45 to 5.62, $p = 0.25$<br>B = 2.56, 95% CI 1.73 to 3.44, $p < 0.0001$<br>B = 0.81, 95% CI 0.04 to 1.58, $p = 0.04$ | 0.22               | $X^2 = 59.31$ , $p < 0.0001$ |
| Model 4 Connecting with others<br>Time spent on positive self-reflection<br><br>Ethnicity<br>Vs. White:<br>Asian                                                                                                                           | $R^2 = 0.26$<br>B = 2.20, 95% CI 1.45 to 2.96, $p < 0.0001$<br><br>B = 8.02, 95% CI 5.04 to 11.00, $p < 0.0001$                                                                                                                                                                                           | 0.25               | $X^2 = 36.53$ , $p < 0.0001$ |

|                                               |                                               |      |                          |
|-----------------------------------------------|-----------------------------------------------|------|--------------------------|
| Black                                         | B = 10.64, 95% CI 7.36 to 13.92, $p < 0.0001$ |      |                          |
| Mixed                                         | B = 2.77, 95% CI -0.70 to 6.23, $p = 0.12$    |      |                          |
| Developed new skills in physical healthcare   | B = 2.73, 95% CI 1.88 to 3.58, $p < 0.0001$   |      |                          |
| Developed new skills in mental healthcare     | B = 0.51, 95% CI -0.25 to 1.27, $p = 0.19$    |      |                          |
| Time spent connecting with colleagues         | B = 1.24, 95% CI 0.37 to 2.11, $p = 0.005$    |      |                          |
| Time spent connecting with friends and family | B = 1.60, 95% CI 0.73 to 2.47, $p < 0.0001$   |      |                          |
| Model 5 Other self-care                       | $R^2 = 0.27$                                  | 0.26 | $X^2 = 1.99, p = 0.55$   |
| Time spent on positive self-reflection        | B = 2.21, 95% CI 1.29 to 2.96, $p < 0.0001$   |      |                          |
| Ethnicity Vs. White:                          |                                               |      |                          |
| Asian                                         | B = 8.04, 95% CI 5.06 to 11.01, $p < 0.0001$  |      |                          |
| Black                                         | B = 12.06, 95% CI 8.70 to 15.43, $p < 0.0001$ |      |                          |
| Mixed                                         | B = 2.91, 95% CI -0.55 to 6.36, $p = 0.09$    |      |                          |
| Developed new skills in physical healthcare   | B = 2.71, 95% CI 1.86 to 3.56, $p < 0.0001$   |      |                          |
| Developed new skills in mental healthcare     | B = 0.53, 95% CI -0.23 to 1.29, $p = 0.17$    |      |                          |
| Time spent connecting with colleagues         | B = 1.29, 95% CI 0.42 to 2.16, $p = 0.004$    |      |                          |
| Time spent connecting with friends and family | B = 1.59, 95% CI 0.68 to 2.50, $p = 0.001$    |      |                          |
| Time spent relaxing or doing hobbies          | B = -0.24, 95% CI -1.07 to 0.59, $p = 0.57$   |      |                          |
| Time spent exercising                         | B = 0.43, 95% CI -0.39 to 1.25, $p = 0.31$    |      |                          |
| Model 6 Feeling supported                     | $R^2 = 0.29$                                  | 0.28 | $X^2 = 27.23, p < 0.001$ |

|                                               |                                               |                       |                              |
|-----------------------------------------------|-----------------------------------------------|-----------------------|------------------------------|
| Time spent on positive self-reflection        | B = 2.06, 95% CI 1.24 to 2.98, $p < 0.0001$   |                       |                              |
| Ethnicity<br>Vs. White:<br>Asian              | B = 8.06, 95% CI 5.09 to 11.04, $p < 0.0001$  |                       |                              |
| Black                                         | B = 12.34, 95% CI 8.97 to 15.72, $p < 0.0001$ |                       |                              |
| Mixed                                         | B = 2.72, 95% CI -0.69 to 6.14, $p = 0.12$    |                       |                              |
| Developed new skills in physical healthcare   | B = 2.52, 95% CI 1.67 to 3.36, $p < 0.0001$   |                       |                              |
| Developed new skills in mental healthcare     | B = 0.36, 95% CI -0.40 to 1.13, $p = 0.35$    |                       |                              |
| Time spent connecting with colleagues         | B = 0.99, 95% CI 0.09 to 1.89, $p = 0.03$     |                       |                              |
| Time spent connecting with friends and family | B = 1.57, 95% CI 0.67 to 2.47, $p = 0.001$    |                       |                              |
| Time spent relaxing or doing hobbies          | B = -0.45, 95% CI -1.28 to 0.38, $p = 0.29$   |                       |                              |
| Time spent exercising                         | B = 0.37, 95% CI -0.46 to 1.19, $p = 0.38$    |                       |                              |
| Felt supported by my immediate team           | B = -0.27, 95% CI -1.29 to 0.75, $p = 0.60$   |                       |                              |
| Felt supported by senior management           | B = 0.85, 95% CI 0.02 to 1.68, $p = 0.04$     |                       |                              |
| Felt supported by the UK government           | B = 1.01, 95% CI 0.22 to 1.80, $p = 0.01$     |                       |                              |
| Felt supported by the people of the UK        | B = 0.96, 95% CI 0.15 to 1.77, $p = 0.02$     |                       |                              |
| Model 7 Professional characteristics          | $R^2 = 0.33$                                  | Adjusted $R^2 = 0.30$ | $X^2 = 50.56$ , $p < 0.0001$ |
| Time spent on positive self-reflection        | B = 1.95, 95% CI 1.10 to 2.79, $p < 0.0001$   |                       |                              |
| Ethnicity<br>Vs. White:<br>Asian              | B = 7.31, 95% CI 3.97 to 10.65, $p < 0.0001$  |                       |                              |

|                                                |                                                |  |  |
|------------------------------------------------|------------------------------------------------|--|--|
| Black                                          | B = 11.48, 95% CI 7.93 to 15.03, $p < 0.0001$  |  |  |
| Mixed                                          | B = 2.95, 95% CI -0.61 to 6.51, $p = 0.10$     |  |  |
| Developed new skills in physical healthcare    | B = 2.15, 95% CI 1.21 to 3.08, $p < 0.001$     |  |  |
| Developed new skills in mental healthcare      | B = 1.27, 95% CI 0.43 to 2.11, $p = 0.003$     |  |  |
| Time spent connecting with colleagues          | B = 0.76, 95% CI -0.15 to 1.66, $p = 0.101$    |  |  |
| Time spent connecting with friends and family  | B = 1.64, 95% CI 0.73 to 2.55, $p < 0.0001$    |  |  |
| Time spent relaxing or doing hobbies           | B = -0.54, 95% CI -1.37 to 0.29, $p = 0.199$   |  |  |
| Time spent exercising                          | B = 0.59, 95% CI -0.25 to 1.42, $p = 0.17$     |  |  |
| Felt supported by my immediate team            | B = -0.47, 95% CI -1.50 to 0.53, $p = 0.37$    |  |  |
| Felt supported by senior management            | B = 0.99, 95% CI 0.14 to 1.84, $p = 0.023$     |  |  |
| Felt supported by the UK government            | B = 0.35, 95% CI -0.46 to 1.16, $p = 0.396$    |  |  |
| Felt supported by the people of the UK         | B = 1.37, 95% CI 0.55 to 2.20, $p = 0.001$     |  |  |
| Profession<br>Vs. non-clinical                 |                                                |  |  |
| AHPs & social workers                          | B = -5.43, 95% CI -8.21 to -2.65, $p < 0.0001$ |  |  |
| HCA's & support workers                        | B = -3.63, 95% CI -7.21 to 0.05, $p = 0.047$   |  |  |
| Medical                                        | B = -4.49, 95% CI -8.40 to -0.58, $p = 0.022$  |  |  |
| Nursing & midwifery                            | B = -4.95, 95% CI -7.50 to -2.40, $p < 0.0001$ |  |  |
| Psychology & psychotherapy                     | B = -6.69, 95% CI -9.40 to -3.97, $p < 0.0001$ |  |  |
| Location of work<br>Vs. Administration offices |                                                |  |  |

|                                                  |                                             |      |                                                                    |
|--------------------------------------------------|---------------------------------------------|------|--------------------------------------------------------------------|
| Community only                                   | B = 0.33, 95% CI -1.35 to 2.01, p = 0.703   |      |                                                                    |
| Inpatient (or mixed)                             | B = -0.54, 95% CI -2.94 to 1.87, p = 0.661  |      |                                                                    |
| Healthcare sector<br>Vs. primary care:           |                                             |      |                                                                    |
| Community physical health                        | B = -3.39, 95% CI -7.50 to 0.72, p = 0.106  |      |                                                                    |
| Mental health                                    | B = -3.93, 95% CI -7.44 to -0.42, p = 0.028 |      |                                                                    |
| NHS Trust<br>Vs. East London<br>CNWL             | B = 0.08, 95% CI -1.81 to 1.97, p = 0.934   |      |                                                                    |
| Devon                                            | B = -0.32, 95% CI -2.32 to 1.69, p = 0.755  |      |                                                                    |
| NSFT                                             | B = -1.03, 95% CI -3.29 to 1.23, p = 0.370  |      |                                                                    |
| Model 8 Exposure to<br>or risk of COVID-19       | R <sup>2</sup> = 0.34                       | 0.31 | X <sup>2</sup> = 15.67, p = 0.0013<br>AIC = 5522.7<br>BIC = 5680.2 |
| Time spent on positive<br>self-reflection        | B = 2.01, 95% CI 1.17 to 2.85, p < 0.0001   |      |                                                                    |
| Ethnicity<br>Vs. White:                          |                                             |      |                                                                    |
| Asian                                            | B = 6.53, 95% CI 3.18 to 9.89, p < 0.0001   |      |                                                                    |
| Black                                            | B = 11.15, 95% CI 7.57 to 14.74, p < 0.0001 |      |                                                                    |
| Mixed                                            | B = 3.17, 95% CI -0.37 to 6.72, p = 0.080   |      |                                                                    |
| Developed new skills<br>in physical healthcare   | B = 2.03, 95% CI 1.10 to 2.96, p < 0.0001   |      |                                                                    |
| Developed new skills<br>in mental healthcare     | B = 0.98, 95% CI 0.14 to 1.83, p = 0.023    |      |                                                                    |
| Time spent connecting<br>with colleagues         | B = 0.73, 95% CI -0.17 to 1.63, p = 0.112   |      |                                                                    |
| Time spent connecting<br>with friends and family | B = 1.67, 95% CI 0.77 to 2.57, p < 0.0001   |      |                                                                    |
| Time spent relaxing or<br>doing hobbies          | B = -0.43, 95% CI -1.25 to 0.40, p = 0.312  |      |                                                                    |
| Time spent exercising                            | B = 0.78, 95% CI -0.05 to 1.62, p = 0.067   |      |                                                                    |

|                                                |                                              |  |  |
|------------------------------------------------|----------------------------------------------|--|--|
| Felt supported by my immediate team            | B = -0.51, 95% CI -1.54 to 0.52, p = 0.334   |  |  |
| Felt supported by senior management            | B = 1.07, 95% CI 0.22 to 1.91, p = 0.013     |  |  |
| Felt supported by the UK government            | B = 0.44, 95% CI -0.36 to 1.24, p = 0.282    |  |  |
| Felt supported by the people of the UK         | B = 1.32, 95% CI 0.50 to 2.15, p = 0.002     |  |  |
| Profession<br>Vs. non-clinical                 |                                              |  |  |
| AHPs & social workers                          | B = -5.41, 95% CI -8.18 to -2.63, p < 0.0001 |  |  |
| HCA's & support workers                        | B = -3.86, 95% CI -7.45 to -0.27, p = 0.035  |  |  |
| Medical                                        | B = -4.58, 95% CI -8.49 to -0.68, p = 0.022  |  |  |
| Nursing & midwifery                            | B = -5.23, 95% CI -7.80 to -2.65, p < 0.0001 |  |  |
| Psychology & psychotherapy                     | B = -6.32, 95% CI -9.04 to -3.60, p < 0.0001 |  |  |
| Location of work<br>Vs. Administration offices |                                              |  |  |
| Community only                                 | B = -0.12, 95% CI -1.80 to 1.56, p = 0.890   |  |  |
| Inpatient (or mixed)                           | B = -0.40, 95% CI -2.73 to 1.99, p = 0.741   |  |  |
| Healthcare sector<br>Vs. primary care:         |                                              |  |  |
| Community physical health                      | B = -3.79, 95% CI -7.87 to 0.30, p = 0.069   |  |  |
| Mental health                                  | B = -3.92, 95% CI -7.41 to -0.44, p = 0.027  |  |  |
| NHS Trust<br>Versus East London<br>CNWL        | B = 0.47, 95% CI -1.41 to 2.36, p = 0.627    |  |  |
| Devon                                          | B = -0.03, 95% CI -2.03 to 1.96, p = 0.974   |  |  |
| NSFT                                           | B = -1.00, 95% CI -3.24 to 1.25, p = 0.383   |  |  |
| Extent of anxiety about the personal and work- | B = 2.05, 95% CI 0.80 to 3.30, p = 0.001     |  |  |

|                                                                              |                                              |                       |                                                                   |
|------------------------------------------------------------------------------|----------------------------------------------|-----------------------|-------------------------------------------------------------------|
| related consequences of COVID-19                                             |                                              |                       |                                                                   |
| Self, family or friends becoming seriously ill or hospitalised with COVID-19 | B = 1.10, 95% CI -0.73 to 2.92, p = 0.239    |                       |                                                                   |
| Self or family CEV                                                           | B = 1.41, 95% CI -0.58 to 3.39, p = 0.164    |                       |                                                                   |
| Model 9 Final model removing non-significant predictors                      | R <sup>2</sup> = 0.32                        | R <sup>2</sup> = 0.31 | X <sup>2</sup> = 14.05, p = 0.297<br>AIC = 5512.7<br>BIC = 5614.7 |
| Time spent on positive self-reflection                                       | B = 2.17, 95% CI 1.40 to 2.94, p < 0.0001    |                       |                                                                   |
| Ethnicity<br>Vs. White:                                                      |                                              |                       |                                                                   |
| Asian                                                                        | B = 7.03, 95% CI 3.78 to 10.27, p < 0.0001   |                       |                                                                   |
| Black                                                                        | B = 11.21, 95% CI 7.82 to 14.60, p < 0.0001  |                       |                                                                   |
| Mixed                                                                        | B = 2.85, 95% CI -0.65 to 6.34, p = 0.11     |                       |                                                                   |
| Developed new skills in physical healthcare                                  | B = 2.13, 95% CI 1.23 to 3.04, p < 0.0001    |                       |                                                                   |
| Developed new skills in mental healthcare                                    | B = 1.05, 95% CI 0.22 to 1.88, p = 0.013     |                       |                                                                   |
| Time spent connecting with friends and family                                | B = 1.89, 95% CI 1.10 to 2.67, p < 0.0001    |                       |                                                                   |
| Felt supported by senior management                                          | B = 0.89, 95% CI 0.20 to 1.58, p = 0.012     |                       |                                                                   |
| Felt supported by the people of the UK                                       | B = 1.46, 95% CI 0.70 to 2.21, p < 0.0001    |                       |                                                                   |
| Profession<br>Vs. non-clinical AHPs & social workers                         | B = -5.60, 95% CI -7.77 to -3.42, p < 0.0001 |                       |                                                                   |
| HCA's & support workers                                                      | B = -3.56, 95% CI -6.69 to -0.44, p = 0.026  |                       |                                                                   |

|                                                                                |                                               |  |  |
|--------------------------------------------------------------------------------|-----------------------------------------------|--|--|
| Medical                                                                        | B = - 4.92, 95% CI -8.40 to - 1.44, p = 0.006 |  |  |
| Nursing & midwifery                                                            | B = -5.24, 95% CI -7.22 to - 3.26, p < 0.0001 |  |  |
| Psychology & psychotherapy                                                     | B = -6.52, 95% CI -8.67 to - 4.83, p < 0.0001 |  |  |
| Healthcare sector<br>Vs. primary care:                                         |                                               |  |  |
| Community physical health                                                      | B = -4.16, 95% CI -8.21 to - 0.11, p = 0.044  |  |  |
| Mental health                                                                  | B = 3.68, 95% CI -7.06 to - 0.31, p = 0.032   |  |  |
| Extent of anxiety about the personal and work-related consequences of COVID-19 | B = 2.10, 95% CI 0.88 to 3.32, p = 0.001      |  |  |

AHP Allied Health Professional; CEV Clinically extremely vulnerable; HCA Healthcare Assistant; NHS National Health Service; UK United Kingdom
